# Supplementary material for: Fast Principal Component Analysis of Large-Scale Genome-Wide Data
Source: PubMed Central journal article supplement (PMC3981753; doi:10.1371/journal.pone.0093766), 2014-04-09

# PC 2

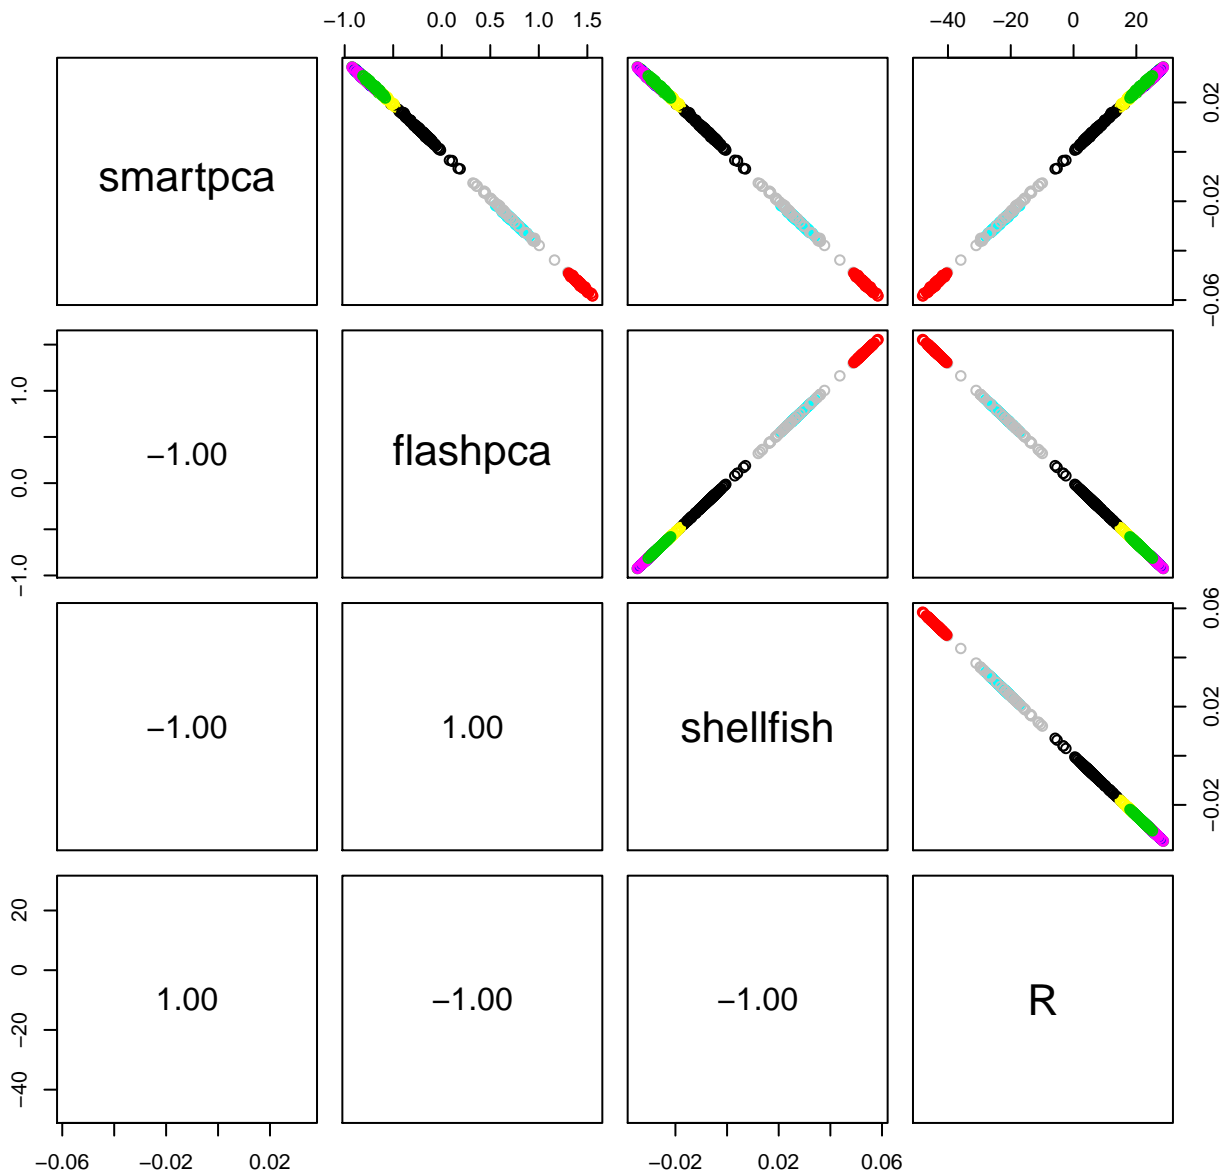

# PC 3

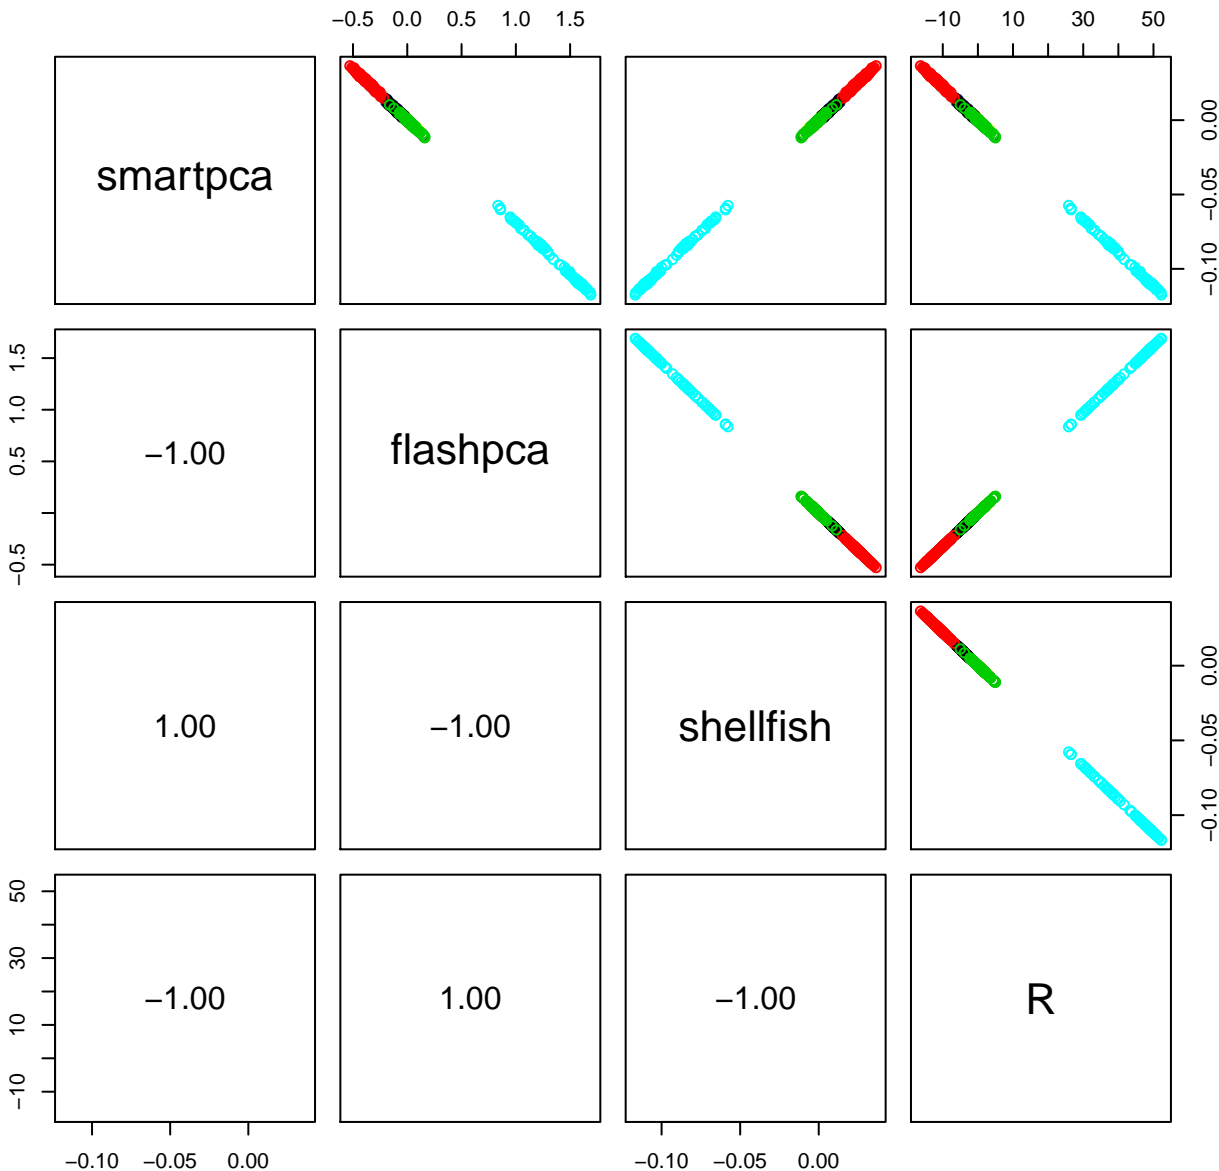

# PC 4

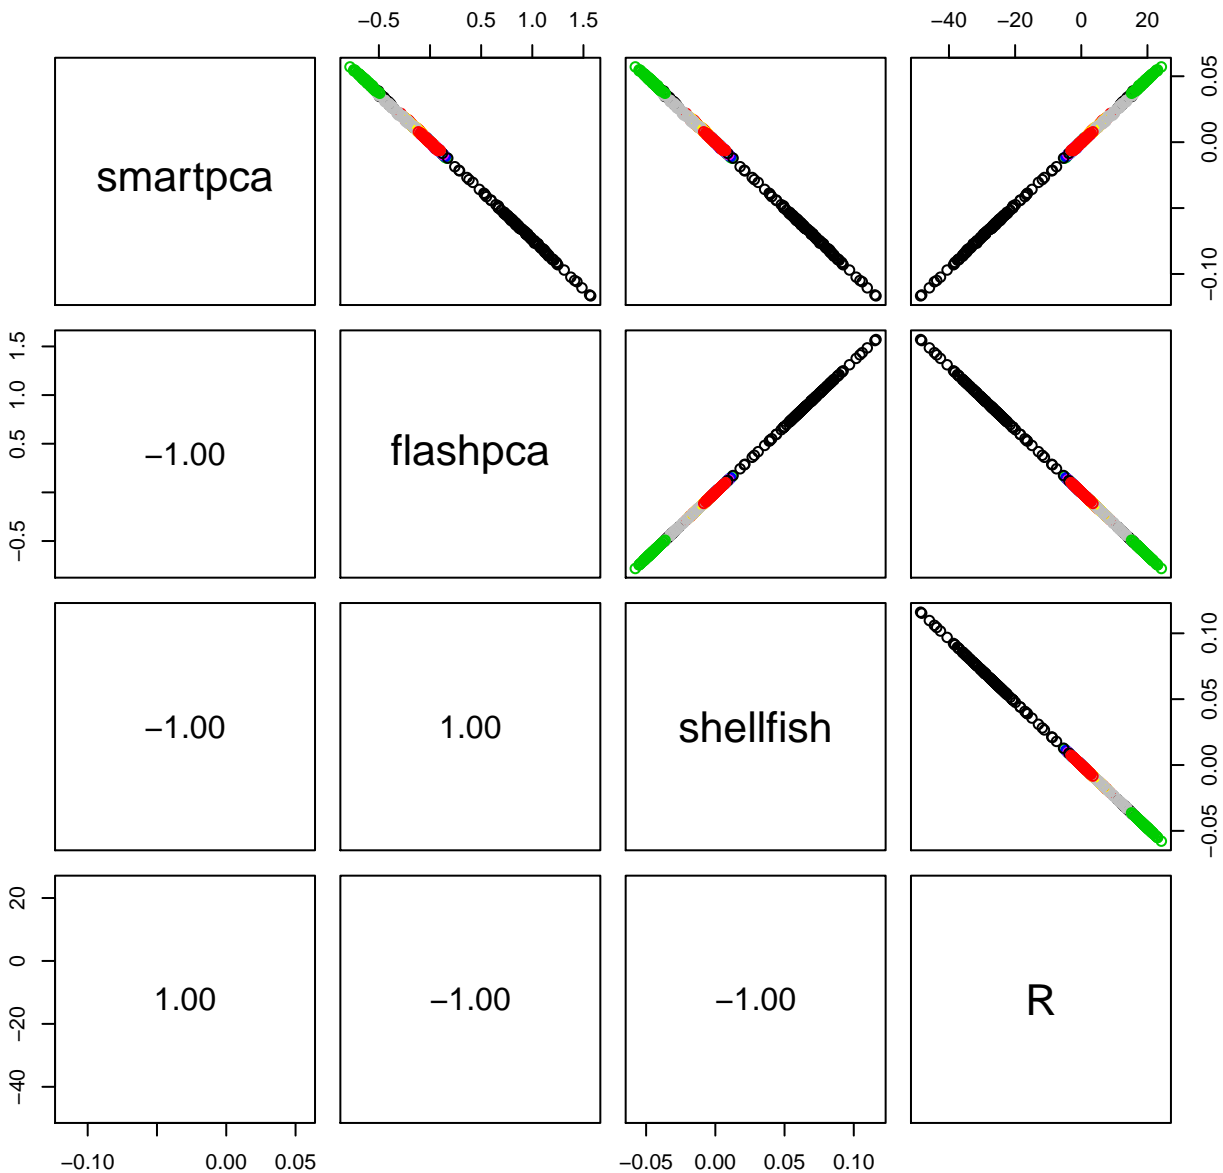

# PC 5

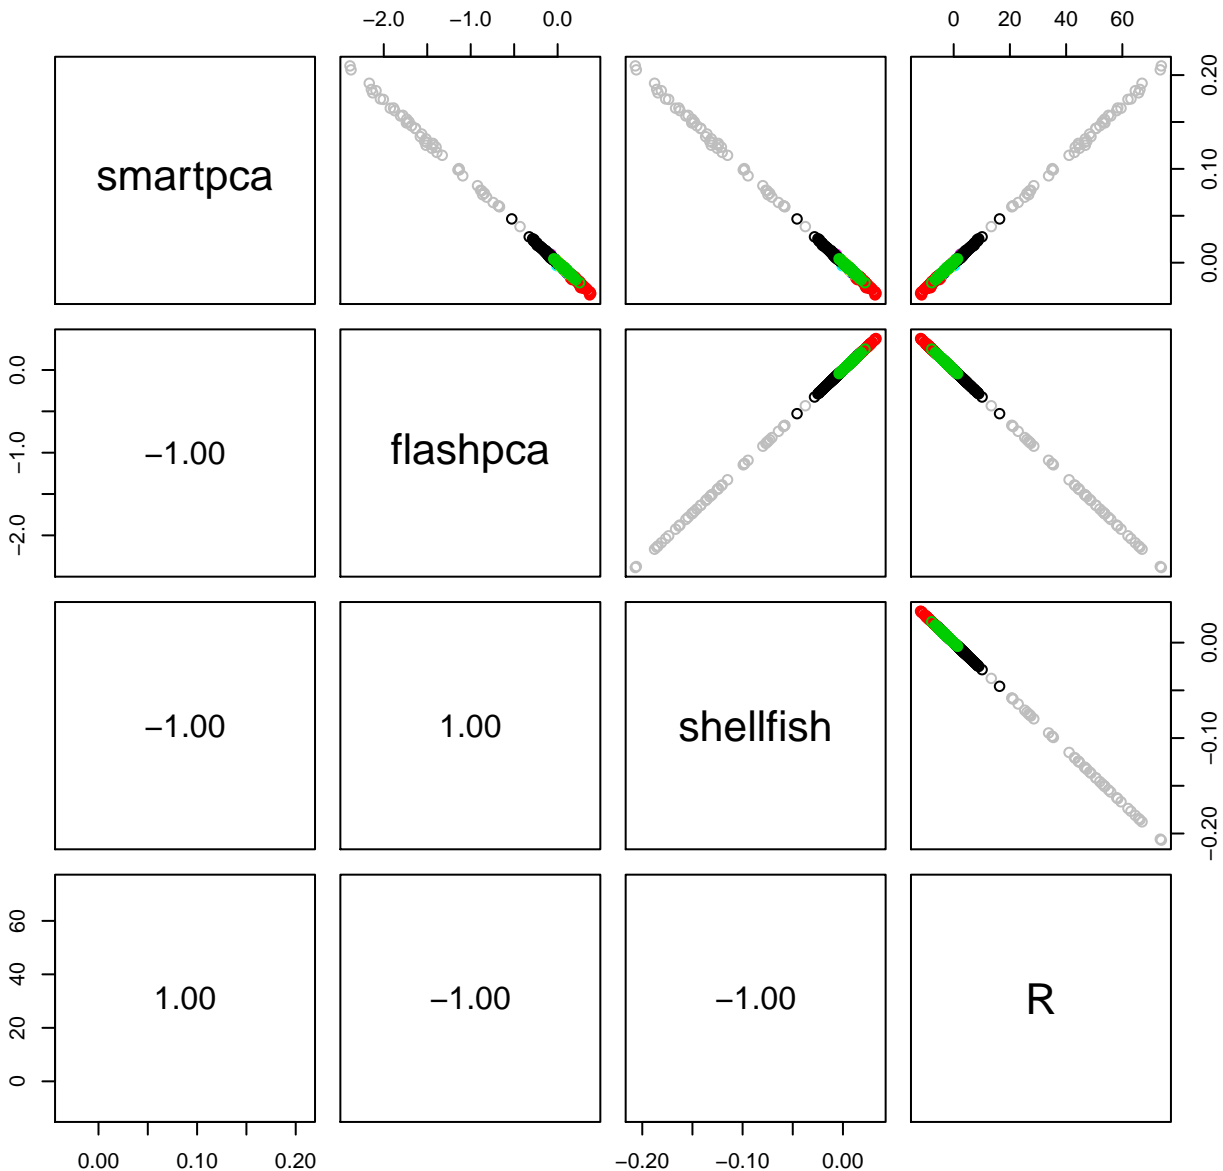

# PC 6

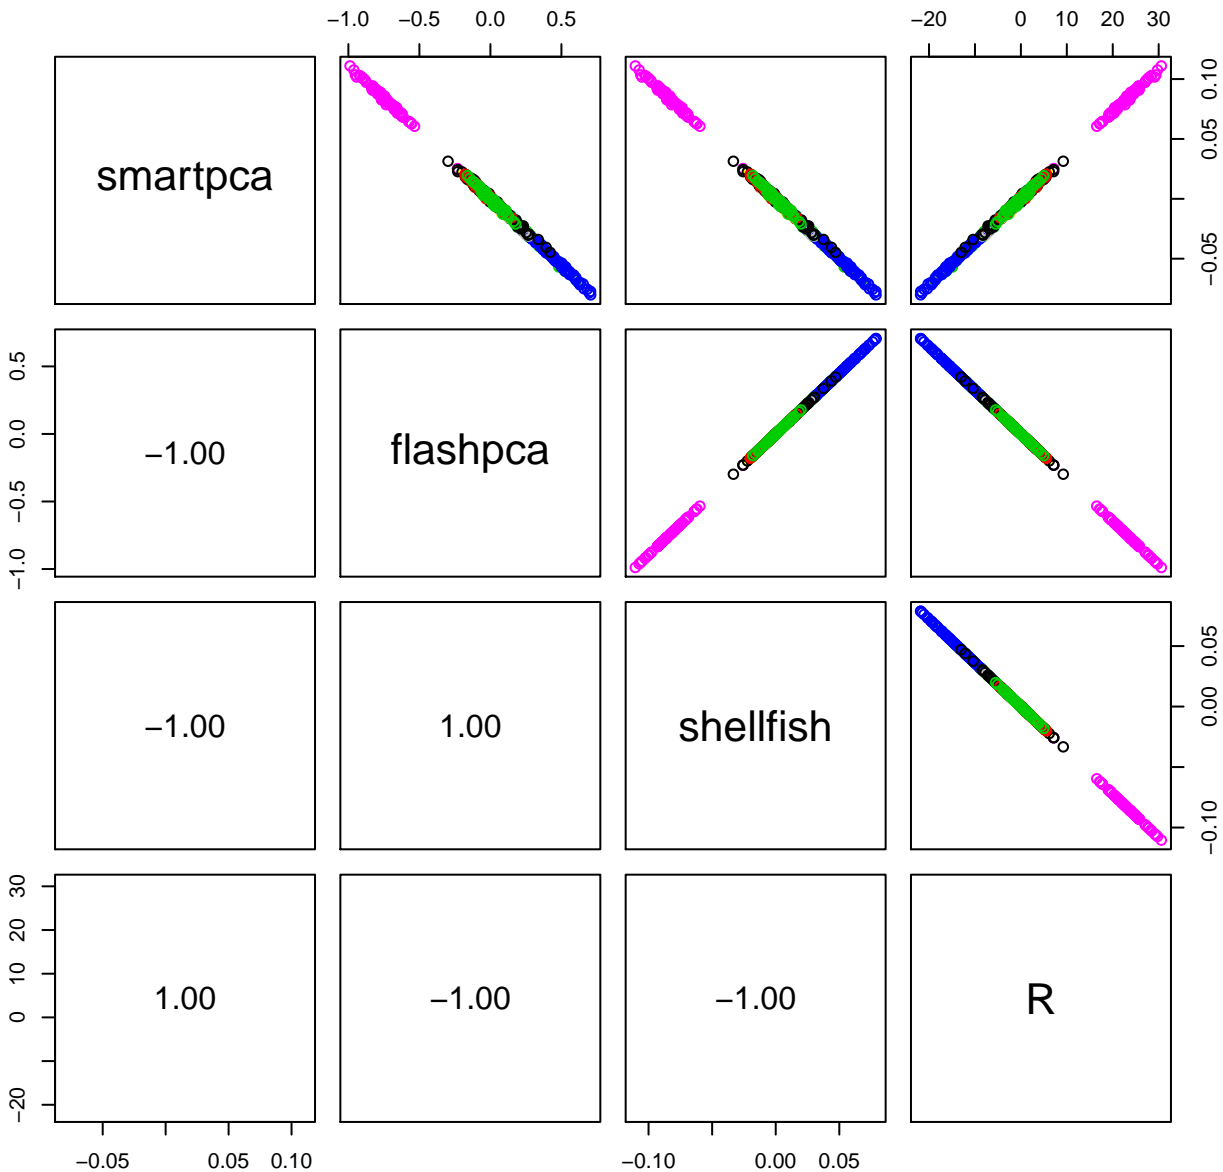

# PC 7

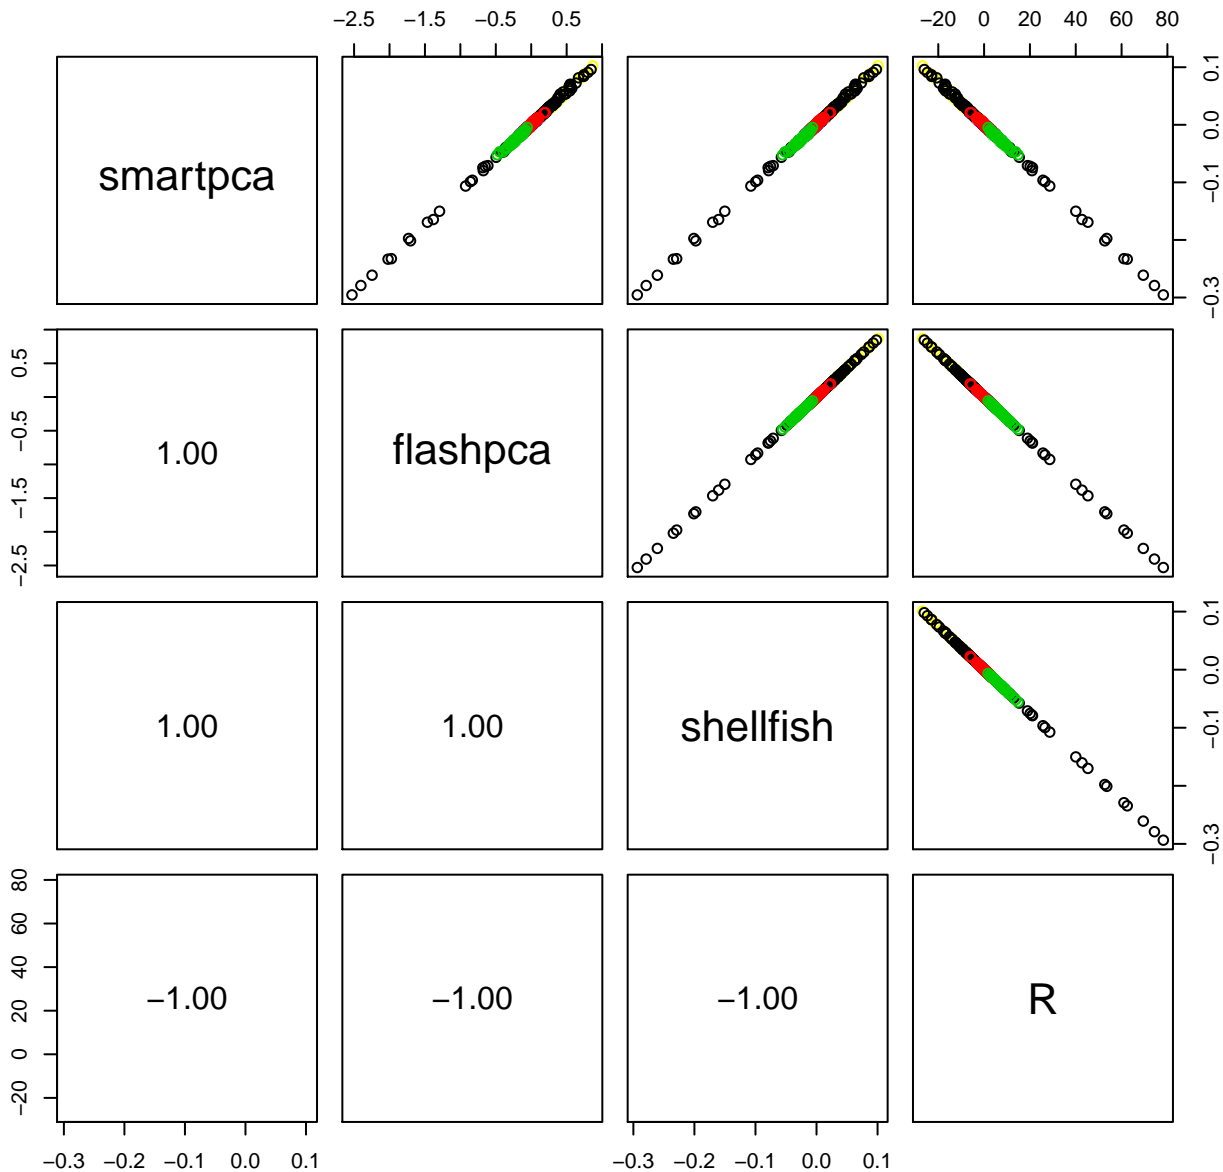

# PC 8

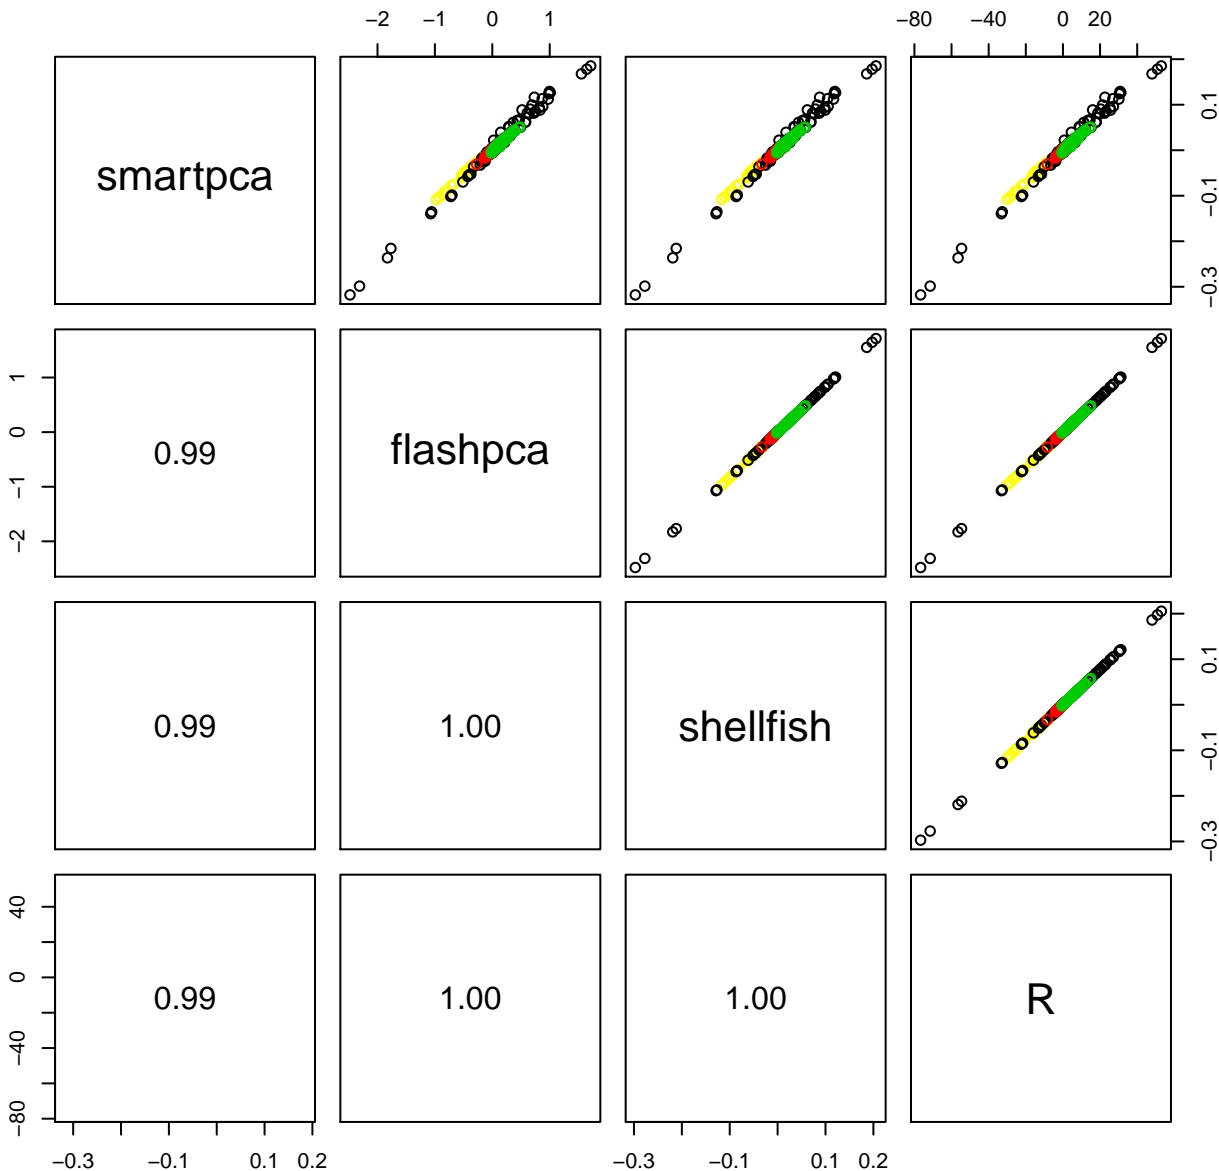



# PC 9

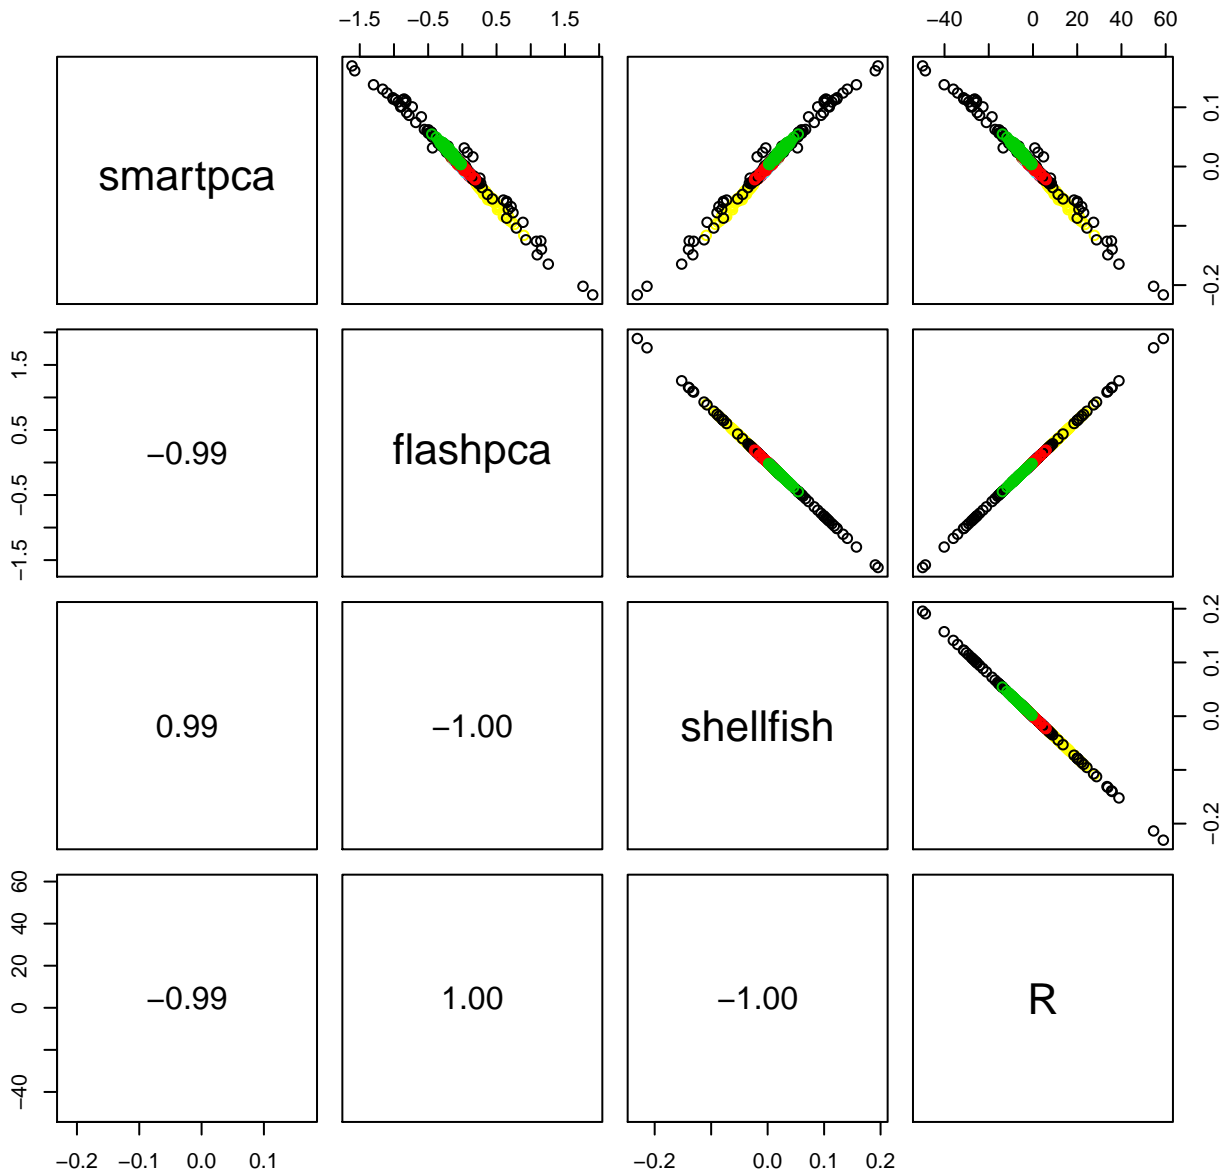

# PC 10

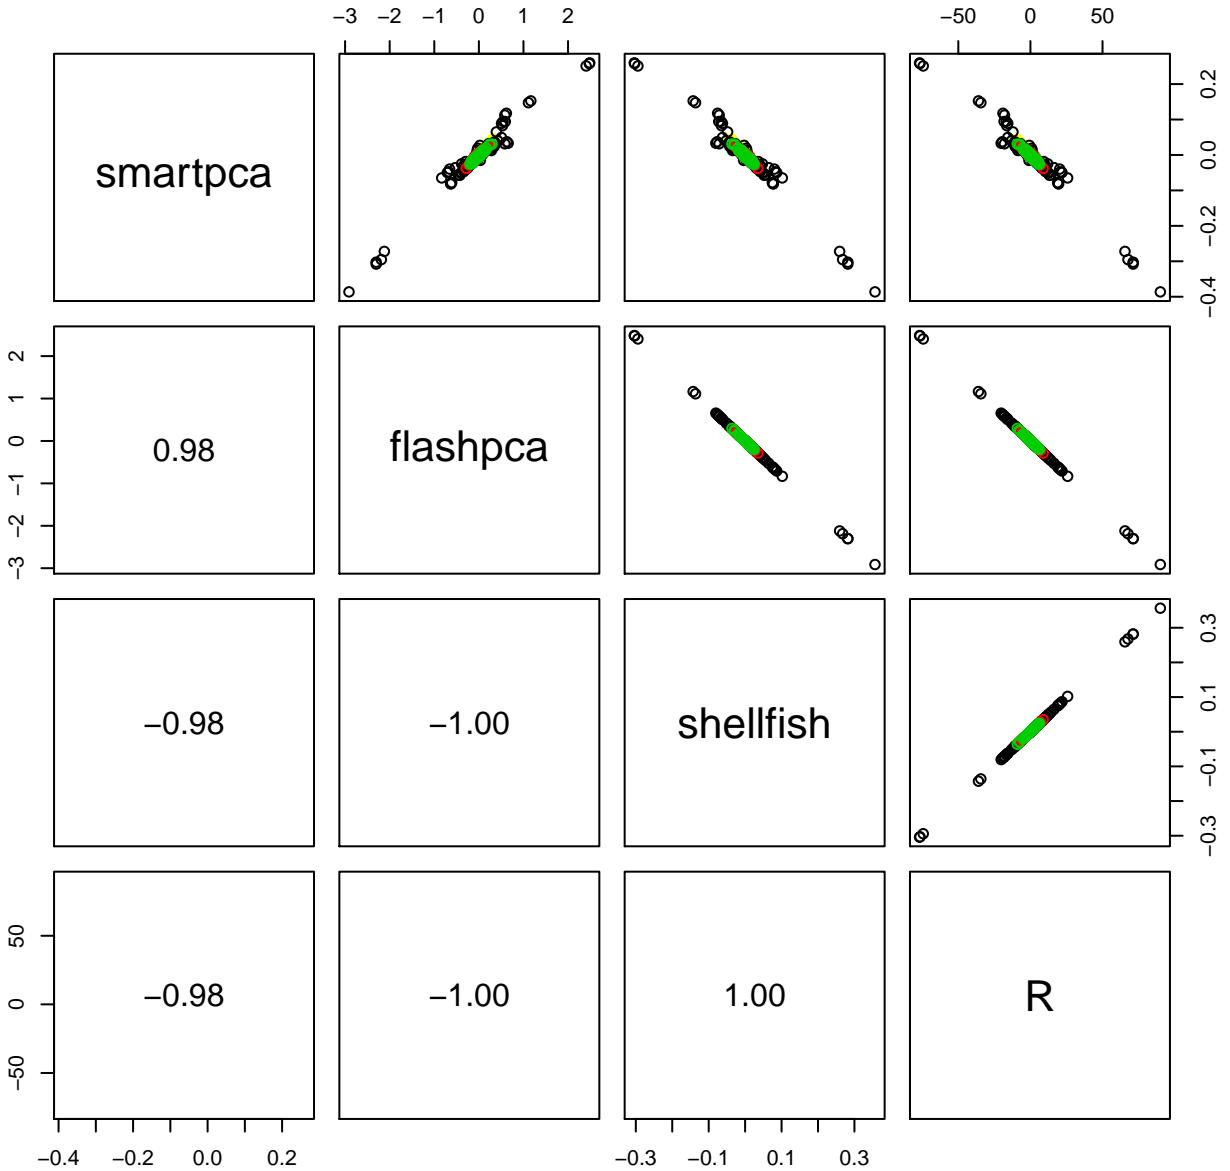

Supplement: pone.0093766.s001.pdf [file pone.0093766.s001.pdf]
